# Supplementary material
Source: PubMed Central journal article supplement (PMC5470350)
Supplement: jama-317-1774-s001.pdf [file jama-317-1774-s001.pdf]

## Supplementary Online Content

Tringale KR, Marshall D, Mackey TK, Connor M, Murphy JD, Hattangadi-Gluth JA. Types and distribution of payments from industry to physicians in 2015. *JAMA*. doi:10.1001/jama.2017.3091

**eFigure 1.** Study population selection criteria

**eTable 1.** Nature of Identified General Payment(s) to Allopathic and Osteopathic Physicians by Specialty Type and Gender in 2015

**eTable 2.** Physicians Receiving General Payments, Holding Ownership Interests, and Receiving Royalty or License Payments in 2015 by Gender Within Specialty Category

This supplementary material has been provided by the authors to give readers additional information about their work.

**eFigure 1.** Study population selection criteria

A. National Plan & Provider Enumeration System (NPPES) study population

|                                                                      |  |                                                                           |
|----------------------------------------------------------------------|--|---------------------------------------------------------------------------|
| NPPES records                                                        |  |                                                                           |
| <b>n=4,977,051</b>                                                   |  |                                                                           |
|                                                                      |  |                                                                           |
|                                                                      |  | Organizations with records<br>(e.g. hospitals, pharmacies)                |
|                                                                      |  | <b>n=1,254,905</b>                                                        |
|                                                                      |  |                                                                           |
| Unique NPPES providers                                               |  |                                                                           |
| <b>n=3,722,146</b>                                                   |  |                                                                           |
|                                                                      |  |                                                                           |
|                                                                      |  | Providers with practice location outside the US:                          |
|                                                                      |  | Non-US: <b>n=3,107</b>                                                    |
|                                                                      |  | Territories/outlying minor US islands: <b>n=11,026</b>                    |
|                                                                      |  |                                                                           |
| US providers                                                         |  |                                                                           |
| <b>n=3,708,013</b>                                                   |  |                                                                           |
|                                                                      |  |                                                                           |
|                                                                      |  | Physicians with enumeration date in 2016<br>or deactivated before 2015    |
|                                                                      |  | <b>n=162,308</b>                                                          |
|                                                                      |  |                                                                           |
| US providers in 2015                                                 |  |                                                                           |
| <b>n=3,545,705</b>                                                   |  |                                                                           |
|                                                                      |  |                                                                           |
|                                                                      |  | Non-allopathic and non-osteopathic US<br>providers                        |
|                                                                      |  | <b>n=2,611,452</b>                                                        |
|                                                                      |  |                                                                           |
| US allopathic and osteopathic physicians<br>in 2015                  |  |                                                                           |
| <b>n= 934,253</b>                                                    |  |                                                                           |
|                                                                      |  |                                                                           |
|                                                                      |  | US allopathic and osteopathic physicians<br>without a zipcode-matched HRR |
|                                                                      |  | <b>n=958</b>                                                              |
|                                                                      |  |                                                                           |
| US allopathic and osteopathic physicians in<br>2015 with matched HRR |  |                                                                           |
| <b>n=933,295</b>                                                     |  |                                                                           |
|                                                                      |  |                                                                           |

Abbreviations: NPPES, National Plan & Provider Enumeration System; US, United States; HRR, Hospital Referral Region

B. Open Payments physicians used in matching algorithm<sup>a</sup>

|                                                                              |                                                                                                        |
|------------------------------------------------------------------------------|--------------------------------------------------------------------------------------------------------|
| Total Open Payment records                                                   |                                                                                                        |
| <b>n=11,901,001</b><br>(G=11,132,000; R=764,679; O=4,322)                    |                                                                                                        |
|                                                                              |                                                                                                        |
|                                                                              | Records for non-physician recipients<br>(e.g. family member or institution)                            |
|                                                                              | <b>n=755,532</b><br>(G=38,998; R=716,329; O=205)                                                       |
|                                                                              |                                                                                                        |
| Total Open Payment records attributable to physicians                        |                                                                                                        |
| <b>n=11,145,469</b><br>(G=11,093,002; R=48,350; O=4,117)                     |                                                                                                        |
|                                                                              |                                                                                                        |
|                                                                              | Records for providers with practice location outside the US or US Territories:                         |
|                                                                              | <b>n=419</b><br>(G=415; R=1; O=3)                                                                      |
|                                                                              |                                                                                                        |
| Open Payment records for allopathic and osteopathic US physicians            |                                                                                                        |
| <b>n=11,145,050</b><br>(G=11,092,587; R=48,349; O=4,114)                     |                                                                                                        |
|                                                                              |                                                                                                        |
|                                                                              | Records for non-allopathic or osteopathic physicians                                                   |
|                                                                              | <b>n=515,600</b><br>(G=512,646; R=2,817; O=137)                                                        |
|                                                                              |                                                                                                        |
| Open Payment records for allopathic and osteopathic US physicians            |                                                                                                        |
| <b>n=10,629,450</b><br>(G=10,579,941; R=45,532; O=3,977)                     |                                                                                                        |
|                                                                              |                                                                                                        |
|                                                                              | Multiple payment records for one physician                                                             |
|                                                                              | <b>n=10,153,445</b>                                                                                    |
|                                                                              |                                                                                                        |
| US allopathic and osteopathic physicians receiving a payment                 |                                                                                                        |
| <b>n=476,005</b>                                                             |                                                                                                        |
|                                                                              |                                                                                                        |
|                                                                              | Physicians in Open Payments without a matched NPPES record<br>(confirmed by 2 text string identifiers) |
|                                                                              | <b>n=22,993</b>                                                                                        |
|                                                                              |                                                                                                        |
| US allopathic and osteopathic physicians receiving industry payments in 2015 |                                                                                                        |
| <b>n=449,864</b>                                                             |                                                                                                        |
|                                                                              |                                                                                                        |

Abbreviations: US, United States; NPPES, National Plan & Provider Enumeration System; G, General Payment; R, Research payment; O, Ownership Interest or Investment

<sup>a</sup>Includes any physician with a record in Open Payments, not exclusive of those receiving a payment in 2015

<sup>b</sup>Crosswalk file refers to the “PY2015 – Covered Recipient Physicians – NPPES data” file provided by Open Payments that contains crosswalk of all covered recipient physicians and physician principle investigators that have been against NPPES

C. Overall Merging Algorithm to Match National Plan & Provider Enumeration System (NPPES) data with Open Payments

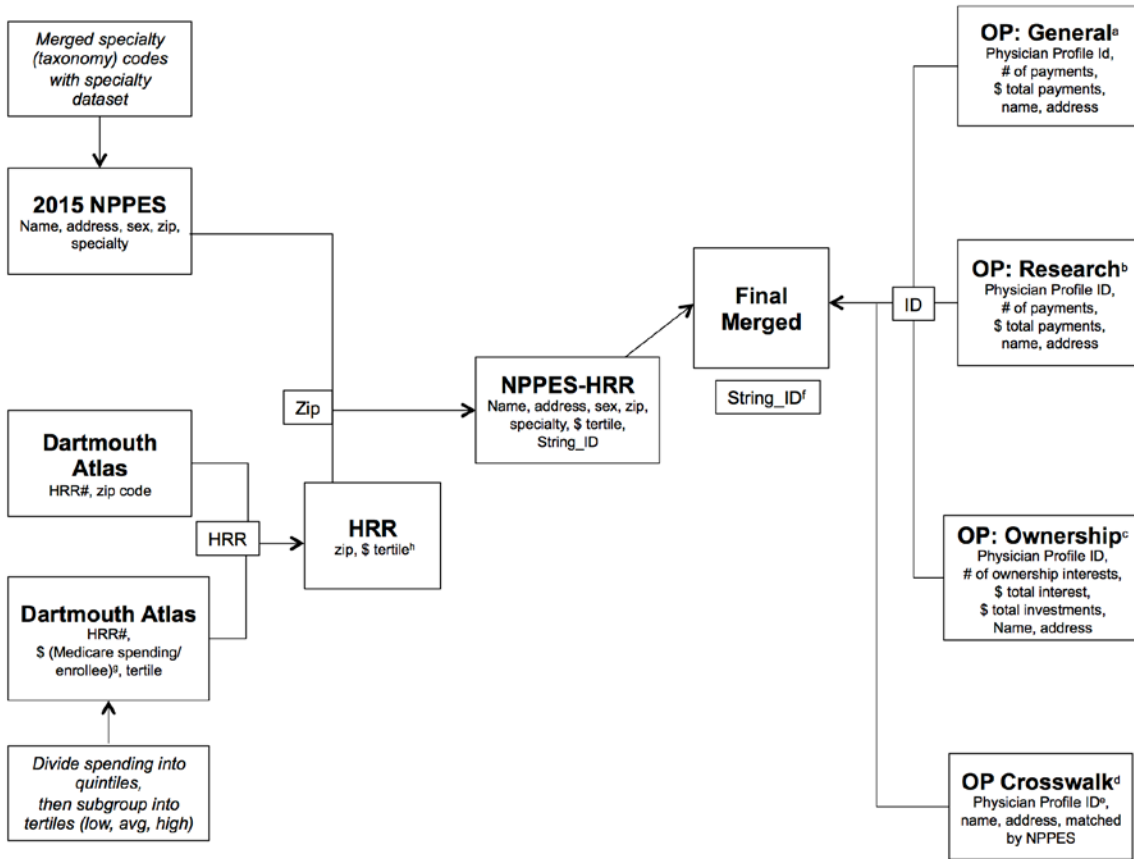

Abbreviations: NPPES, National Plan & Provider Enumeration System; HRR, Hospital Referral Region; OP, Open Payments; ID, identification

<sup>a</sup>General payments include all forms of payments other than those classified for research (including, but not limited to, consulting fees, honoraria, gifts, entertainment, food and beverages, travel and lodging, education, charitable contributions, and other compensation).

<sup>b</sup>Research payments include all forms of payments for research activities pursued under a written contract or protocol, such as publications or medical research writing.

<sup>c</sup>Ownership interests include stocks/stock options, partnership shares, or other financial instruments secured by the reporting entity held by the physician.

<sup>d</sup>Crosswalk file contains covered recipient physicians crosswalked against NPPES, including Physician Profile ID, Data Source, Physician Name Information, Address, and Primary Taxonomy. This file does not include National Provider Identifiers (NPIs).

<sup>e</sup>Physician Profile ID is a number assigned to each physician in Open Payments used in this data preparation to merge all reported Open Payments for a single physician.

<sup>f</sup>String\_ID refers to a concatenated string used for merging Open Payments data to provider identifying information in NPPES. Specifically, two String\_IDs were created: the primary consisted of “FirstName\_LastName\_Address” and the backup identifier consisted of “FirstName\_LastName\_ZipCode”

<sup>g</sup>\$ refers to Medicare spending/enrollee in the HRR. This monetary value was used to separate spending into quintiles based on spending/enrollee amount.

<sup>h</sup>\$ tertile” refers to the spending tertile assigned based on amount of Medicare spending/enrollee for the HRR. The tertiles were grouped based on the original quintiles (lowest, highest, and grouped middle three).

| <b>eTable 1. Nature of Identified General Payment(s) to Allopathic and Osteopathic Physicians by Specialty Type and Gender in 2015</b> |                                            |                                   |                                         |                                       |                                              |
|----------------------------------------------------------------------------------------------------------------------------------------|--------------------------------------------|-----------------------------------|-----------------------------------------|---------------------------------------|----------------------------------------------|
|                                                                                                                                        | <b>Specialty Category</b>                  |                                   |                                         |                                       |                                              |
|                                                                                                                                        | <b>Male Recipients</b><br><i>N=315,974</i> | <b>Surgery</b><br><i>N=85,142</i> | <b>Primary Care</b><br><i>N=129,962</i> | <b>Specialists</b><br><i>N=54,174</i> | <b>Interventionalists</b><br><i>N=45,973</i> |
| <b>MALE PHYSICIANS</b>                                                                                                                 |                                            |                                   |                                         |                                       |                                              |
| <b>Total Value, USD (%)<sup>a</sup></b>                                                                                                | 1,586,083,451                              | 726,052,771                       | 374,348,380                             | 244,213,458                           | 241,468,841                                  |
| Charitable Contribution                                                                                                                | 3,666,404 (0.2)                            | 3,490,910 (0.5)                   | 105,070 (0.0)                           | 28,362 (0.0)                          | 42,062 (0.0)                                 |
| Services <sup>c</sup>                                                                                                                  | 412,403,471 (26.0)                         | 63,050,119 (8.7)                  | 160,229,455 (42.8)                      | 96,713,437 (39.6)                     | 92,410,461 (38.3)                            |
| Faculty or Speaker (Accredited) <sup>d</sup>                                                                                           | 20,042,947 (1.3)                           | 3,306,500 (0.5)                   | 3,491,805 (0.9)                         | 5,949,606 (2.4)                       | 7,295,037 (3.0)                              |
| Faculty or Speaker (Non-Accredited) <sup>e</sup>                                                                                       | 1,073,668 (0.1)                            | 197,511 (0.0)                     | 139,961 (0.0)                           | 286,219 (0.1)                         | 449,977 (0.2)                                |
| Consulting Fee                                                                                                                         | 267,190,922 (16.8)                         | 113,342,526 (15.6)                | 68,248,144 (18.2)                       | 41,536,329 (17.0)                     | 44,063,923 (18.3)                            |
| Ownership or Investment Interest <sup>f</sup>                                                                                          | 40,421,236 (2.5)                           | 27,939,560 (3.9)                  | 3,313,900 (0.9)                         | 919,183 (0.4)                         | 8,248,594 (3.4)                              |
| Education                                                                                                                              | 26,453,816 (1.7)                           | 18,339,419 (2.5)                  | 4,326,198 (1.2)                         | 1,917,367 (0.8)                       | 1,870,831 (0.8)                              |
| Entertainment                                                                                                                          | 142,410 (0.0)                              | 54,195 (0.0)                      | 15,259 (0.0)                            | 41,735 (0.0)                          | 31,222 (0.0)                                 |
| Food and Beverage                                                                                                                      | 161,069,886 (10.2)                         | 34,930,708 (4.8)                  | 71,093,891 (19.0)                       | 22,843,297 (9.4)                      | 32,201,990 (13.3)                            |
| Gift                                                                                                                                   | 1,479,603 (0.1)                            | 805,393 (0.1)                     | 224,774 (0.1)                           | 288,940 (0.1)                         | 160,496 (0.1)                                |
| Grant                                                                                                                                  | 10,283,471 (0.6)                           | 2,132,428 (0.3)                   | 2,750,327 (0.7)                         | 2,570,238 (1.1)                       | 2,830,478 (1.2)                              |
| Honoraria                                                                                                                              | 26,519,308 (1.7)                           | 7,046,999 (1.0)                   | 6,654,258 (1.8)                         | 6,728,645 (2.8)                       | 6,089,406 (2.5)                              |
| Royalty or License                                                                                                                     | 472,315,328 (29.8)                         | 405,086,208 (55.8)                | 11,001,512 (2.9)                        | 39,142,563 (16.0)                     | 17,085,045 (7.1)                             |
| Travel and Lodging                                                                                                                     | 143,020,981 (9.0)                          | 46,330,296 (6.4)                  | 42,753,828 (11.4)                       | 25,247,537 (10.3)                     | 28,689,320 (11.9)                            |
| <i>P</i> <sup>b</sup>                                                                                                                  | <.001                                      | <.001                             | <.001                                   | <.001                                 | <.001                                        |
| <b>FEMALE PHYSICIANS</b>                                                                                                               |                                            |                                   |                                         |                                       |                                              |
| <b>Total Value, USD (%)<sup>a</sup></b>                                                                                                | 185,471,166                                | 34,755,180                        | 84,081,522                              | 49,476,913                            | 17,157,551                                   |
| Charitable Contribution                                                                                                                | 443,411 (0.2)                              | 434,997 (1.3)                     | 5,914 (0.0)                             | 0 (0.0)                               | 2,500 (0.0)                                  |
| Services <sup>c</sup>                                                                                                                  | 59,431,147 (32.0)                          | 5,553,054 (16.0)                  | 29,035,270 (34.5)                       | 20,175,714 (40.8)                     | 4,667,109 (27.2)                             |
| Faculty or Speaker (Accredited) <sup>d</sup>                                                                                           | 3,377,972 (1.8)                            | 367,657 (1.1)                     | 1,087,022 (1.3)                         | 1,585,187 (3.2)                       | 338,105 (2.0)                                |
| Faculty or Speaker (Non-Accredited) <sup>e</sup>                                                                                       | 150,294 (0.1)                              | 17,578 (0.1)                      | 56,700 (0.1)                            | 45,016 (0.1)                          | 31,000 (0.2)                                 |
| Consulting Fee                                                                                                                         | 32,922,668 (17.8)                          | 5,161,822 (14.9)                  | 15,264,858 (18.2)                       | 9,443,690 (19.1)                      | 3,052,298 (17.8)                             |
| Ownership or Investment Interest <sup>f</sup>                                                                                          | 2,654,103 (1.4)                            | 140,264 (0.4)                     | 53,423 (0.1)                            | 98,067 (0.2)                          | 2,362,349 (13.8)                             |
| Education                                                                                                                              | 3,667,415 (2.0)                            | 1,772,243 (5.1)                   | 1,102,138 (1.3)                         | 644,558 (1.3)                         | 148,475 (0.9)                                |
| Entertainment                                                                                                                          | 15,885 (0.00)                              | 2,245 (0.0)                       | 6,040 (0.0)                             | 5,909 (0.0)                           | 1,691 (0.0)                                  |
| Food and Beverage                                                                                                                      | 43,179,381 (23.3)                          | 6,162,221 (17.7)                  | 25,755,275 (30.6)                       | 8,347,704 (16.9)                      | 2,914,181 (17.0)                             |
| Gift                                                                                                                                   | 289,224 (0.2)                              | 94,156 (0.3)                      | 119,708 (0.1)                           | 70,725 (0.1)                          | 4,635 (0.0)                                  |
| Grant                                                                                                                                  | 3,551,003 (1.9)                            | 457,288 (1.3)                     | 1,214,424 (1.4)                         | 1,493,275 (3.0)                       | 386,016 (2.3)                                |
| Honoraria                                                                                                                              | 3,943,624 (2.1)                            | 650,357 (1.9)                     | 1,130,003 (1.3)                         | 1,690,357 (3.4)                       | 472,908 (2.8)                                |
| Royalty or License                                                                                                                     | 11,436,212 (6.2)                           | 9,713,544 (28.0)                  | 340,224 (0.4)                           | 822,035 (1.7)                         | 560,409 (3.3)                                |
| Travel and Lodging                                                                                                                     | 20,408,826 (11.0)                          | 4,227,753 (12.2)                  | 8,910,524 (10.6)                        | 5,054,675 (10.2)                      | 2,215,874 (12.9)                             |

Abbreviations: USD, United States dollars; N, analytic population

<sup>a</sup>Percent (%) of all general payments within column

<sup>b</sup>The proportion of general payments in each nature-of-payment category was statistically significantly different between men and women when compared within all specialties combined and within each specialty type (Chi-squared test, *P*<.001, two-sided test).

<sup>c</sup>Compensation for services other than consulting, including serving as a faculty or as a speaker at a venue other than continuing medical education

<sup>d</sup>Compensation for serving as faculty or as a speaker for accredited or certified continuing medical education

<sup>e</sup>Compensation for serving as faculty or as a speaker for non-accredited or non-certified continuing medical education

<sup>f</sup>Ownership or investment interests currently held by physicians, as well as ownership interests or investments that physicians have not yet exercised

**eTable 2.** Physicians Receiving General Payments, Holding Ownership Interests, and Receiving Royalty or License Payments in 2015 by Gender Within Specialty Category

|                           |                          | Physicians receiving general payments          |                                      | Total per-physician annual value of payments |                                   | Total per-physician number of payments |                                   |
|---------------------------|--------------------------|------------------------------------------------|--------------------------------------|----------------------------------------------|-----------------------------------|----------------------------------------|-----------------------------------|
|                           | Analytic Population, No. | No. Physician Recipients, No. (%) <sup>a</sup> | Absolute Rate Difference, % (95% CI) | Mean Value Per-Physician, USD (95% CI)       | Absolute Difference, USD (95% CI) | Mean No. Per-Physician, No. (95% CI)   | Absolute Difference, No. (95% CI) |
| <i>Specialty Category</i> |                          |                                                |                                      |                                              |                                   |                                        |                                   |
| <i>Surgery</i>            |                          |                                                |                                      |                                              |                                   |                                        |                                   |
| Male                      | 136,327                  | 85,142 (62.5)                                  | 5.9 (5.4, 6.5)                       | 8,528 (7,257, 9,798)                         | 7,163 (4,827, 9,498)              | 14.2 (14.0, 14.3)                      | 4.4 (4.1, 4.7)                    |
| Female                    | 45,045                   | 25,462 (56.5)                                  | 0 (referent)                         | 1,365 (921, 1,809)                           | 0 (referent)                      | 9.8 (9.6, 9.9)                         | 0 (referent)                      |
| <i>Primary Care</i>       |                          |                                                |                                      |                                              |                                   |                                        |                                   |
| Male                      | 255,564                  | 129,962 (50.9)                                 | 7.8 (7.4, 8.1)                       | 2,880 (2,751, 3,010)                         | 1,772 (1,593, 1,951)              | 32.3 (32.0, 32.6)                      | 12.6 (12.1, 13.0)                 |
| Female                    | 176,255                  | 75,868 (43.0)                                  | 0 (referent)                         | 1,108 (1,036, 1,181)                         | 0 (referent)                      | 19.7 (19.4, 20.0)                      | 0 (referent)                      |
| <i>Specialists</i>        |                          |                                                |                                      |                                              |                                   |                                        |                                   |
| Male                      | 149,115                  | 54,174 (36.3)                                  | 2.9 (2.5, 3.4)                       | 4,508 (4,040, 4,976)                         | 2,455 (1,743, 3,167)              | 20.8 (20.4, 21.2)                      | 4.2 (3.5, 4.8)                    |
| Female                    | 72,140                   | 24,100 (33.4)                                  | 0 (referent)                         | 2,053 (1,871, 2,235)                         | 0 (referent)                      | 16.6 (16.2, 17.1)                      | 0 (referent)                      |
| <i>Interventionalists</i> |                          |                                                |                                      |                                              |                                   |                                        |                                   |
| Male                      | 79,160                   | 45,973 (58.1)                                  | 17.4 (16.6, 18.2)                    | 5,252 (4,895, 5,609)                         | 3,111 (2,217, 4,005)              | 31.1 (30.7, 31.5)                      | 15.3 (14.2, 16.3)                 |
| Female                    | 19,689                   | 8,013 (40.7)                                   | 0 (referent)                         | 2,141 (1,515, 2,768)                         | 0 (referent)                      | 15.8 (15.2, 16.4)                      | 0 (referent)                      |

Abbreviations: CI, confidence interval; No., number

<sup>a</sup>Percent (%) represents proportion of physicians receiving payment of all physicians in the subcategory's analytic population

**eTable 2 Continued.** Physicians Receiving General Payments, Holding Ownership Interests, and Receiving Royalty or License Payments in 2015 by Gender Within Specialty Category

| Specialty Category        | Analytic Population, No. | Physicians with ownership interests            |                                      | Physicians receiving royalty or license payments |                                   |
|---------------------------|--------------------------|------------------------------------------------|--------------------------------------|--------------------------------------------------|-----------------------------------|
|                           |                          | No. Physician Recipients, No. (%) <sup>a</sup> | Absolute Rate Difference, % (95% CI) | No. Physician Recipients, No. (%) <sup>a</sup>   | Absolute Difference, USD (95% CI) |
| <b>Surgery</b>            |                          |                                                |                                      |                                                  |                                   |
| Male                      | 136,327                  | 1,533 (1.1)                                    | 0.92 (0.85, 0.99)                    | 1,634 (1.2)                                      | 1.2 (1.1, 1.2)                    |
| Female                    | 45,045                   | 94 (0.21)                                      | 0 (referent)                         | 13 (0.03)                                        | 0 (referent)                      |
| <b>Primary Care</b>       |                          |                                                |                                      |                                                  |                                   |
| Male                      | 255,564                  | 701 (0.27)                                     | -0.06 (-0.09, -0.02)                 | 45 (0.02)                                        | 0.02 (0.01, 0.02)                 |
| Female                    | 176,255                  | 585 (0.33)                                     | 0 (referent)                         | 4 (0.002)                                        | 0 (referent)                      |
| <b>Specialists</b>        |                          |                                                |                                      |                                                  |                                   |
| Male                      | 149,115                  | 182 (0.12)                                     | 0.08 (0.05, 0.10)                    | 115 (0.08)                                       | 0.07 (0.05, 0.08)                 |
| Female                    | 72,140                   | 32 (0.04)                                      | 0 (referent)                         | 6 (0.01)                                         | 0 (referent)                      |
| <b>Interventionalists</b> |                          |                                                |                                      |                                                  |                                   |
| Male                      | 79,160                   | 168 (0.21)                                     | 0.18 (0.14, 0.22)                    | 103 (0.13)                                       | 0.09 (0.06, 0.13)                 |
| Female                    | 19,689                   | 7 (0.04)                                       | 0 (referent)                         | 7 (0.04)                                         | 0 (referent)                      |

Abbreviations: CI, confidence interval; No., number

<sup>a</sup>Percent (%) represents proportion of physicians receiving payment of all physicians in the subcategory's analytic population
